# Supplementary material for: The effect of ω-3 polyunsaturated fatty acids on the liver lipidome, proteome and bile acid profile: parenteral versus enteral administration
Source: PubMed Central journal article supplement (PMC6910966; doi:10.1038/s41598-019-54225-8), 2019-12-13
Supplement: 41598_2019_54225_MOESM3_ESM.pdf [file 41598_2019_54225_MOESM3_ESM.pdf]

The effect of  $\omega$ -3 polyunsaturated fatty acids on the liver lipidome, proteome and bile acid profile: parenteral versus enteral administration

Kamila Bechynska, Nikola Daskova, Nikola Vrzackova<sup>1</sup>, Karel Harant, Marie Heczkova, Katerina Podzimkova, Miriam Bratova, Helena Dankova, Zuzana Berkova, Vit Kosek, Jaroslav Zelenka, Jana Hajslava, Radislav Sedlacek, Jiri Suttnar, Alzbeta Hlavackova, Lenka Bartonova, Monika Cahova

Supplementary Table 1 Serum VIP lipids

| PNIL vs control    |           | ENIL vs control    |           | PNILOV vs control  |           | ENILOV vs control  |           | PNIL vs ENIL       |           | PNILOV vs ENILOV   |           | PNIL vs PNILOV     |           | ENIL vs ENILOV     |           |
|--------------------|-----------|--------------------|-----------|--------------------|-----------|--------------------|-----------|--------------------|-----------|--------------------|-----------|--------------------|-----------|--------------------|-----------|
| Lipid name         | VIP score |                    | VIP score |                    | VIP score | Lipid name         | VIP score | Lipid name         | VIP score | Lipid name         | VIP score | Lipid name         | VIP score | Lipid name         | VIP score |
| PE(18:0/18:1)      | 1,91      | CE(18:2)           | 3,42      | PE(18:0/18:1)      | 2,14      | CE(18:2)           | 2,77      | CE(18:2)           | 2,69      | PE(18:0/18:1)      | 2,24      | CE(18:2)           | 2,18      | LPC(20:5)          | 2,21      |
| PE(16:0/18:1)      | 1,80      | Cer:NS(d18:1/23:0) | 1,77      | CE(18:2)           | 2,13      | FA(20:5)           | 2,03      | PE(18:0/18:1)      | 1,80      | PE(16:0/18:1)      | 2,19      | FA(20:5)           | 1,98      | FA(20:5)           | 2,20      |
| PE(38:6)           | 1,79      | Cer:NS(d18:1/25:0) | 1,63      | PE(16:0/18:1)      | 1,77      | TG(18:2/22:6/22:6) | 1,99      | PE(16:0/18:1)      | 1,77      | PE(34:1)           | 1,95      | TG(20:4/20:4/20:4) | 1,89      | PC(16:1/20:4)      | 2,11      |
| PC(17:0/20:4)      | 1,60      | LPC(19:0)          | 1,32      | PE(38:6)           | 1,89      | LPC(20:5)          | 1,95      | PE(34:1)           | 1,44      | PE(16:0/20:4)      | 1,70      | TG(18:2/22:6/22:6) | 1,85      | PC(36:5)           | 2,10      |
| PE(34:1)           | 1,53      | PE(38:6)           | 1,27      | PE(34:1)           | 1,88      | PC(36:5)           | 1,82      | Cer:NS(d18:1/23:0) | 1,43      | PE(38:6)           | 1,68      | LPC(20:5)          | 1,75      | TG(18:2/22:6/22:6) | 1,92      |
| LPC(19:0)          | 1,47      | LPC(17:0)          | 1,27      | PC(36:5)           | 1,73      | TG(20:4/20:4/20:4) | 1,71      | PC(34:1)           | 1,42      | PE(18:0/18:2)      | 1,63      | PC(36:5)           | 1,75      | TG(20:4/20:4/20:4) | 1,76      |
| LPC(17:0)          | 1,43      | Cer:NS(d18:1/24:1) | 1,21      | PE(18:0/18:2)      | 1,71      | PC(16:1/20:4)      | 1,71      | PC(16:0/18:1)      | 1,36      | PE(18:0/20:4)      | 1,61      | PC(16:1/20:4)      | 1,74      | TG(16:1/18:2/18:2) | 1,49      |
| PC(17:0/20:4)      | 1,43      | Cer:NS(d18:1/24:1) | 1,20      | LPC(20:5)          | 1,70      | Cer:NS(d18:1/23:0) | 1,50      | PC(14:0/18:1)      | 1,35      | PE(18:0/20:4)      | 1,60      | TG(20:3/20:4/20:4) | 1,64      | PC(36:4)           | 1,47      |
| TG(20:4/20:4/20:4) | 1,42      | PC(17:0/20:4)      | 1,20      | PC(16:1/20:4)      | 1,67      | FA(22:6)           | 1,47      | PE(38:6)           | 1,30      | PE(16:0/18:2)      | 1,60      | PE(18:0/18:1)      | 1,38      | FA(22:6)           | 1,45      |
| TG(18:2/20:4/20:5) | 1,40      | PC(17:0/18:2)      | 1,18      | FA(20:5)           | 1,63      | TG(16:0/18:2/22:6) | 1,30      | TG(18:2/20:4/20:5) | 1,30      | PC(36:1)           | 1,53      | PC(36:4)           | 1,36      | TG(16:0/18:2/22:5) | 1,39      |
| LPC(17:0)          | 1,34      | PC(18:0/22:6)      | 1,17      | PE(18:0/20:4)      | 1,59      | PE(38:6)           | 1,29      | TG(20:4/20:4/20:4) | 1,29      | PC(18:0/18:1)      | 1,47      | PE(16:0/18:1)      | 1,36      | FA(22:5)           | 1,36      |
| LPC(19:0)          | 1,34      | SM(40:1)           | 1,16      | TG(18:2/22:6/22:6) | 1,58      | FA(22:5)           | 1,28      | Cer:NS(d18:1/24:0) | 1,28      | PC(16:0/18:1)      | 1,47      | PE(18:0/18:2)      | 1,33      | TG(20:3/20:4/20:4) | 1,27      |
| PE(16:0/20:4)      | 1,30      | PC(17:0/18:2)      | 1,13      | PE(16:0/18:2)      | 1,58      | PC(18:0/20:4)      | 1,27      | PC(17:0/20:4)      | 1,28      | PC(34:1)           | 1,39      | TG(18:2/20:4/20:5) | 1,32      | TG(16:0/18:2/22:6) | 1,26      |
| TG(16:0/18:2/20:5) | 1,29      | LPC(20:3)          | 1,12      | PE(18:0/20:4)      | 1,56      | TG(20:3/20:4/20:4) | 1,24      | PE(16:0/20:4)      | 1,28      | PC(14:0/18:1)      | 1,33      | PE(34:1)           | 1,31      | TG(16:0/20:4/20:4) | 1,23      |
| PE(18:0/20:4)      | 1,27      | Cer:NS(d18:1/25:0) | 1,10      | PE(16:0/20:4)      | 1,48      | LPC(19:0)          | 1,23      | TG(18:2/18:2/22:6) | 1,27      | Cer:NS(d18:1/22:0) | 1,25      | TG(20:4/20:4/20:4) | 1,31      | TG(16:0/18:2/20:5) | 1,21      |
| TG(18:2/18:2/22:6) | 1,27      | PC(16:1/20:4)      | 1,08      | TG(20:4/20:4/20:4) | 1,39      | PC(36:4)           | 1,22      | Cer:NS(d18:1/25:0) | 1,27      | Cer:NS(d18:1/16:0) | 1,16      | FA(22:5)           | 1,30      | PC(38:5)           | 1,19      |
| TG(16:0/18:2/20:4) | 1,27      | PC(18:2/19:0)      | 1,07      | XI(PC:16:0/18:1)   | 1,34      | TG(16:0/20:4/20:4) | 1,21      | TG(20:4/20:4/20:4) | 1,27      | LPE(18:0)          | 1,13      | TG(20:3/20:4/20:4) | 1,30      | TG(16:0/18:1/22:6) | 1,19      |
| TG(20:3/20:4/20:4) | 1,27      | Cer:NS(d18:1/24:0) | 1,04      | TG(20:3/20:4/20:4) | 1,32      | TG(16:0/18:1/20:4) | 1,20      | PC(32:2)           | 1,26      | Cer:NS(d18:1/23:0) | 1,13      | PC(38:5)           | 1,26      | PC(18:0/20:5)      | 1,18      |
| PE(16:0/18:2)      | 1,21      | FAHFA(18:0/20:2)   | 1,04      | LPC(20:2)          | 1,32      | TG(16:0/18:1/22:4) | 1,16      | TG(18:2/18:2/20:4) | 1,23      | PC(35:2)           | 1,13      | FA(22:6)           | 1,26      | TG(16:0/18:2/22:5) | 1,10      |
| PC(17:0/18:2)      | 1,21      | PC(18:1/18:2)      | 1,01      | PC(34:1)           | 1,29      | PC(17:0/20:4)      | 1,14      | LPC(16:1)          | 1,23      | LPE(16:0)          | 1,10      | TG(16:0/18:2/22:5) | 1,23      | TG(16:0/18:2/20:4) | 1,09      |
| PE(18:0/18:2)      | 1,20      | LPC(17:0)          | 1,00      | LPC(19:0)          | 1,28      | LPC(20:2)          | 1,11      | PI(18:0/20:3)      | 1,21      | LPC(19:0)          | 1,10      | TG(18:2/18:2/20:5) | 1,23      | TG(18:2/18:2/20:5) | 1,06      |
| TG(15:0/18:2/18:2) | 1,19      | LPC(15:0)          | 1,00      | PC(36:1)           | 1,28      | PC(17:0/20:4)      | 1,11      | PC(18:1/18:2)      | 1,20      | Cer:NS(d18:1/24:1) | 1,09      | PE(38:6)           | 1,23      | TG(16:0/18:1/20:4) | 1,06      |
| PC(34:1)           | 1,19      |                    |           | PC(36:4)           | 1,27      | TG(16:0/18:2/22:5) | 1,08      | TG(18:2/18:2/20:5) | 1,20      | Cer:NS(d18:1/24:1) | 1,07      | PC(18:0/20:5)      | 1,19      | TG(18:2/18:2/20:4) | 1,04      |
| PI(18:0/20:3)      | 1,18      |                    |           | FA(22:6)           | 1,25      | TG(16:0/18:2/22:5) | 1,08      | PC(16:1/18:2)      | 1,20      | DG(18:0/20:4)      | 1,06      | TG(16:0/18:2/20:5) | 1,19      | TG(16:0/18:1/22:4) | 1,02      |
| PC(40:8)           | 1,17      |                    |           | PC(18:0/18:1)      | 1,24      | TG(16:0/18:2/20:5) | 1,08      | Cer:NS(d18:1/24:1) | 1,19      | TG(16:0/16:0/20:4) | 1,04      | TG(16:0/18:2/18:2) | 1,19      | TG(18:2/18:2/18:3) | 1,02      |
| PC(40:8)           | 1,17      |                    |           | LPC(19:0)          | 1,22      | TG(18:2/18:2/20:5) | 1,05      | TG(16:0/18:2/20:4) | 1,19      | LPC(18:0)          | 1,04      | PE(16:0/18:2)      | 1,17      |                    |           |
| TG(18:2/20:4/20:4) | 1,16      |                    |           | PC(17:0/20:4)      | 1,20      | TG(16:0/18:2/20:4) | 1,03      | PE(16:0/18:2)      | 1,18      | LPC(17:0)          | 1,02      | TG(16:1/18:2/18:2) | 1,16      |                    |           |
| TG(18:2/18:2/20:5) | 1,15      |                    |           | PC(14:0/18:1)      | 1,19      |                    |           | TG(16:0/16:0/18:3) | 1,15      |                    |           | TG(16:0/16:0/20:4) | 1,15      |                    |           |
| FA(20:5)           | 1,15      |                    |           | LPC(17:0)          | 1,18      |                    |           | LPC(20:3)          | 1,14      |                    |           | PC(36:1)           | 1,14      |                    |           |
| PC(16:0/18:1)      | 1,15      |                    |           | TG(16:0/18:2/18:2) | 1,17      |                    |           | PC(16:1/18:2)      | 1,14      |                    |           | PE(18:0/20:4)      | 1,13      |                    |           |
| LPE(16:0)          | 1,13      |                    |           | LPC(17:0)          | 1,16      |                    |           | TG(18:2/20:4/20:4) | 1,14      |                    |           | TG(16:0/18:1/22:6) | 1,06      |                    |           |
| LPC(20:2)          | 1,11      |                    |           | LPC(18:0)          | 1,06      |                    |           | Cer:NS(d18:1/24:1) | 1,13      |                    |           | TG(16:0/18:2/22:6) | 1,06      |                    |           |
| LPC(15:0)          | 1,11      |                    |           | LPE(18:0)          | 1,06      |                    |           | LPE(16:0)          | 1,12      |                    |           | TG(16:0/20:4/22:6) | 1,05      |                    |           |
| TG(20:4/20:4/20:4) | 1,05      |                    |           | LPE(16:0)          | 1,05      |                    |           | LPC(14:0)          | 1,11      |                    |           | PC(18:0/18:1)      | 1,03      |                    |           |
| PC(14:0/18:1)      | 1,02      |                    |           | PC(17:0/20:4)      | 1,04      |                    |           | LPC(19:0)          | 1,11      |                    |           | TG(16:0/18:1/18:2) | 1,03      |                    |           |
| PC(40:5)           | 1,01      |                    |           | TG(16:0/18:2/18:3) | 1,03      |                    |           | TG(18:2/22:6/22:6) | 1,09      |                    |           |                    |           |                    |           |
| PC(16:1/18:2)      | 1,00      |                    |           | TG(16:0/16:0/20:4) | 1,03      |                    |           | PC(38:1)           | 1,09      |                    |           |                    |           |                    |           |
|                    |           |                    |           | PC(35:2)           | 1,02      |                    |           | PC(18:0/20:3)      | 1,09      |                    |           |                    |           |                    |           |
|                    |           |                    |           | PC(40:8)           | 1,02      |                    |           | PC(40:8)           | 1,08      |                    |           |                    |           |                    |           |
|                    |           |                    |           | TG(15:0/18:2/18:2) | 1,02      |                    |           | TG(16:0/20:4/22:6) | 1,07      |                    |           |                    |           |                    |           |
|                    |           |                    |           |                    |           |                    |           | PC(32:0)           | 1,06      |                    |           |                    |           |                    |           |
|                    |           |                    |           |                    |           |                    |           | TG(20:3/20:4/20:4) | 1,06      |                    |           |                    |           |                    |           |
|                    |           |                    |           |                    |           |                    |           | TG(16:0/18:2/20:5) | 1,05      |                    |           |                    |           |                    |           |
|                    |           |                    |           |                    |           |                    |           | CE(18:1)           | 1,03      |                    |           |                    |           |                    |           |
|                    |           |                    |           |                    |           |                    |           | PC(40:8)           | 1,02      |                    |           |                    |           |                    |           |
|                    |           |                    |           |                    |           |                    |           | PE(18:0/18:2)      | 1,01      |                    |           |                    |           |                    |           |
|                    |           |                    |           |                    |           |                    |           | PC(18:0/18:1)      | 1,01      |                    |           |                    |           |                    |           |
|                    |           |                    |           |                    |           |                    |           | TG(16:0/16:1/18:2) | 1,00      |                    |           |                    |           |                    |           |

Supplementary Table 2 Liver VIP lipids

| PNIL vs control       |           | ENIL vs control    |           | PNILOV vs control     |           | ENILOV vs control  |           | PNIL vs ENIL          |           | PNILOV vs ENILOV      |           | PNIL vs PNILOV        |           | ENIL vs ENILOV     |           |
|-----------------------|-----------|--------------------|-----------|-----------------------|-----------|--------------------|-----------|-----------------------|-----------|-----------------------|-----------|-----------------------|-----------|--------------------|-----------|
| Lipid name            | VIP score | Lipid name         | VIP score | Lipid name            | VIP score | Lipid name         | VIP score | Lipid name            | VIP score | Lipid name            | VIP score | Lipid name            | VIP score | Lipid name         | VIP score |
| FAHFA(18:3/18:1)      | 3,00      | PE(18:0/18:1)      | 3,66      | PE(40:6)              | 3,41      | PE(18:0/18:1)      | 2,46      | FAHFA(18:2/18:3)      | 2,97      | PE(40:6)              | 3,47      | PE(18:0/18:1)         | 3,86      | PE(18:0/18:1)      | 4,95      |
| FAHFA(18:2/18:3)      | 2,98      | PG(18:0/20:4)      | 1,95      | FAHFA(18:3/18:1)      | 2,16      | FA(21:5)           | 2,24      | FAHFA(18:3/18:1)      | 2,93      | FAHFA(18:0/18:3)      | 2,49      | PE(40:6)              | 3,22      | PE(P-16:0/20:5)    | 2,01      |
| FAHFA(18:2/18:1)      | 2,94      | PC(14:0/14:0)      | 1,79      | FAHFA(18:0/18:3)      | 2,10      | LPC(20:5)          | 2,13      | FAHFA(16:2/20:1)      | 2,90      | FAHFA(18:3/18:1)      | 2,48      | TG(18:2/22:6/22:6)    | 2,05      | PE(16:0/20:5)      | 1,97      |
| FAHFA(18:2/18:2) FAHF | 2,91      | PI(16:0/20:3)      | 1,69      | FAHFA(18:2/18:3)      | 2,08      | PE(P-16:0/20:5)    | 1,96      | FAHFA(18:2/18:2) FAHF | 2,89      | FAHFA(18:2/18:2) FAHF | 2,45      | FA(21:5)              | 2,05      | LPE(20:5)          | 1,96      |
| FAHFA(18:0/18:3)      | 2,89      | FA(18:2+0)         | 1,66      | FAHFA(18:2/18:1)      | 2,07      | LPE(20:5)          | 1,84      | FAHFA(18:2/18:1)      | 2,89      | FAHFA(18:2/18:1)      | 2,42      | TG(18:2/20:5/22:6)    | 1,98      | PC(16:0/20:5)      | 1,95      |
| FAHFA(16:2/20:1)      | 2,87      | PS(P-20:0/18:0)    | 1,64      | FAHFA(18:2/18:2) FAHF | 2,06      | PC(16:0/20:5)      | 1,76      | FAHFA(18:0/18:3)      | 2,87      | FAHFA(18:2/18:3)      | 2,38      | TG(18:2/22:6/22:6)    | 1,97      | LPC(20:5)          | 1,93      |
| FAHFA(18:3/18:1)      | 2,80      | FA(18:3+0)         | 1,58      | FA(21:5)              | 2,03      | FA(20:5)           | 1,72      | PC(14:0/18:1)         | 1,52      | FAHFA(16:2/20:1)      | 2,29      | TG(18:2/22:5/22:6)    | 1,92      | PE(38:8)           | 1,90      |
| FAHFA(18:2/18:2)      | 2,62      | PE(16:1/20:4)      | 1,56      | PE(18:0/18:1)         | 2,01      | FA(22:6+0)         | 1,70      | PC(19:0/20:4)         | 1,49      | TG(16:0/22:6/22:6)    | 1,87      | TG(18:2/22:5/22:6)    | 1,92      | FA(21:5)           | 1,75      |
| PE(18:0 18:1)         | 2,51      | PC(37:2)           | 1,51      | TG(18:2/22:6/22:6)    | 2,00      | PE(16:0/20:5)      | 1,66      | PC(17:0/20:4)         | 1,43      | TG(18:2/22:5/22:6)    | 1,56      | LPC(20:5)             | 1,88      | PC(35:2)           | 1,72      |
| PC(17:0 20:4)         | 1,75      | PG(16:0/20:4)      | 1,50      | FAHFA(18:3/18:1)      | 1,95      | PG(20:4/22:6)      | 1,63      | PG(18:2/18:2)         | 1,40      | TG(16:0/18:1/22:6)    | 1,55      | TG(16:0/22:6/22:6)    | 1,87      | PE(18:0/20:5)      | 1,52      |
| PC(19:0/20:4)         | 1,69      | PE(16:0/20:5)      | 1,50      | FAHFA(16:0/22:6)      | 1,94      | PC(18:2/20:5)      | 1,61      | PC(20:0/20:4)         | 1,36      | TG(16:0/18:2/18:4)    | 1,45      | PE(P-16:0/20:5)       | 1,87      | PC(40:9)           | 1,52      |
| PI(17:0/20:4)         | 1,55      | FA(18:3)           | 1,49      | TG(18:2/22:5/22:6)    | 1,92      | TG(16:0/18:2/22:6) | 1,60      | TG(14:0/18:2/18:2)    | 1,32      | TG(16:0/18:2/22:4)    | 1,40      | LPE(20:5)             | 1,78      | PE(P-18:0/20:5)    | 1,49      |
| PC(19:0/20:4)         | 1,54      | AcCar(16:0)        | 1,46      | TG(18:2/22:6/22:6)    | 1,90      | PC(40:9)           | 1,60      | PG(18:2/22:6)         | 1,29      | TG(18:2/20:5/22:6)    | 1,40      | PC(16:0/20:5)         | 1,72      | PG(20:4/22:6)      | 1,48      |
| PC(17:0/20:4)         | 1,54      | PI(16:0/20:3)      | 1,42      | FAHFA(16:2/20:1)      | 1,88      | PE(P-18:0/20:4)    | 1,57      | PI(16:0/20:3)         | 1,29      | TG(18:0/18:2/22:5)    | 1,39      | FA(20:5)              | 1,68      | PC(18:1/20:4)      | 1,46      |
| PC(17:2/18:2)         | 1,50      | PI(18:1/20:4)      | 1,41      | TG(18:2/22:5/22:6)    | 1,85      | PE(38:8)           | 1,57      | FA(20:5)              | 1,27      | TG(18:2/22:6/22:6)    | 1,37      | PG(18:2/18:2)         | 1,63      | FA(22:4)           | 1,46      |
| PC(20:2/20:4)         | 1,48      | PE(17:0/18:2)      | 1,41      | LPC(20:5)             | 1,84      | FA(22:6)           | 1,53      | TG(16:0/16:1/18:2)    | 1,24      | TG(16:0/18:2/22:4)    | 1,33      | PE(16:0/20:5)         | 1,60      | TG(18:2/22:6/22:6) | 1,35      |
| PE(40:7)              | 1,44      | PC(14:0/18:1)      | 1,40      | TG(18:2/20:5/22:6)    | 1,82      | PC(40:4)           | 1,52      | TG(16:0/18:1/18:1)    | 1,23      | TG(18:2/18:3/18:3)    | 1,33      | TG(20:4/20:4/20:4)    | 1,60      | PC(17:1/18:2)      | 1,33      |
| CE(20:4)              | 1,44      | FA(18:4)           | 1,39      | FAHFA(18:2/18:2)      | 1,81      | FA(22:5)           | 1,51      | TG(18:1/18:2/20:2)    | 1,21      | PE(17:2/22:5)         | 1,32      | PE(38:8)              | 1,56      | PC(18:0/20:5)      | 1,33      |
| PE(17:0/18:2)         | 1,44      | PC(35:2)           | 1,39      | PE(P-16:0/20:5)       | 1,68      | PE(40:4)           | 1,51      | FA(20:5+0)            | 1,20      | TG(16:1/18:2/22:6)    | 1,31      | DG(18:1/22:6)         | 1,47      | TG(18:2/22:6/22:6) | 1,28      |
| PE(17:0/20:4)         | 1,42      | FA(20:3)           | 1,39      | TG(20:4/20:4/20:4)    | 1,61      | PE(40:6)           | 1,50      | PE(37:3)              | 1,20      | TG(16:0/18:2/20:4)    | 1,30      | FA(22:5)              | 1,43      | PE(P-18:0/22:4)    | 1,28      |
| CE(18:1)              | 1,41      | PE(16:0/20:5)      | 1,39      | PC(16:0/20:5)         | 1,59      | TG(16:0/18:2/20:4) | 1,49      | TG(16:0/18:2/22:4)    | 1,20      | TG(18:1/18:1/20:4)    | 1,30      | DG(18:2/22:6)         | 1,42      | PI(18:0/22:6)      | 1,24      |
| PC(37:2)              | 1,40      | PE(34:3)           | 1,38      | PC(20:2/20:4)         | 1,59      | PC(18:3/20:4)      | 1,49      | TG(16:0/18:2/22:5)    | 1,20      | TG(18:1/18:2/20:2)    | 1,29      | FA(22:6+0)            | 1,38      | PE(18:0/22:4)      | 1,23      |
| PC(15:0/20:4)         | 1,36      | SM(43:1)           | 1,36      | LPE(20:5)             | 1,54      | PG(18:2/18:2)      | 1,46      | PC(O-41:2)            | 1,19      | DG(18:1/22:6)         | 1,29      | PC(35:2)              | 1,36      | FA(20:5)           | 1,21      |
| PE(17:2/22:5)         | 1,35      | PE(38:8)           | 1,35      | PC(14:0/14:0)         | 1,54      | TC(14:0/18:2/18:2) | 1,46      | PG(18:0/20:4)         | 1,17      | TG(18:1/18:2/22:6)    | 1,29      | FA(18:4)              | 1,36      | PG(18:2/18:2)      | 1,20      |
| FA(20:3)              | 1,35      | PC(34:3)           | 1,34      | PE(17:2/22:5)         | 1,48      | FA(18:4)           | 1,45      | PC(20:2/20:4)         | 1,16      | PE(36:5)              | 1,29      | PC(40:9)              | 1,33      | PE(P-18:0/20:4)    | 1,17      |
| PE(17:0/20:4)         | 1,34      | PI(16:0/20:4)      | 1,33      | FA(18:4)              | 1,46      | PE(P-18:0/22:4)    | 1,45      | TG(16:0/18:1/18:2)    | 1,16      | TG(16:0/18:2/22:6)    | 1,28      | CE(22:5)              | 1,31      | PE(40:4)           | 1,16      |
| PC(20:0/20:4)         | 1,34      | PG(18:2/19:0)      | 1,33      | DG(18:1/22:6)         | 1,45      | PE(18:0/20:4)      | 1,43      | PE(18:0/22:5)         | 1,16      | TG(18:2/18:2/22:6)    | 1,28      | TG(16:1/18:2/18:2)    | 1,31      | PC(18:2/20:5)      | 1,16      |
| PE(19:0/20:4)         | 1,33      | PC(36:4)           | 1,33      | FA(20:5)              | 1,45      | PE(18:0/20:4)      | 1,43      | PI(18:0/20:3)         | 1,15      | PE(36:4)              | 1,27      | FAHFA(16:2/20:1)      | 1,30      | PE(40:6)           | 1,13      |
| PC(18:2/19:0)         | 1,32      | PI(16:0/18:2)      | 1,33      | FA(22:5)              | 1,44      | PC(19:0/20:4)      | 1,41      | TG(18:0/18:1/20:4)    | 1,15      | PE(17:0/18:2)         | 1,27      | TG(20:4/20:4/20:4)    | 1,27      | PC(40:4)           | 1,11      |
| PC(17:1/20:4)         | 1,30      | FA(22:4)           | 1,32      | PE(16:0/20:5)         | 1,43      | PC(20:2/20:4)      | 1,41      | FA(20:4+0)            | 1,15      | PC(14:0/18:1)         | 1,27      | FAHFA(18:2/18:3)      | 1,26      | FA(22:6+0)         | 1,10      |
| PC(17:0/18:2)         | 1,27      | PE(16:0/18:1)      | 1,32      | FA(22:6+0)            | 1,42      | PC(18:0/22:4)      | 1,40      | PE(18:0/20:3)         | 1,13      | TG(18:0/18:2/22:6)    | 1,26      | PC(18:1/20:4)         | 1,26      | PI(18:0/22:5)      | 1,09      |
| PG(18:2/18:2)         | 1,25      | PC(17:0/20:4)      | 1,32      | PE(17:0/18:2)         | 1,41      | TG(16:0/18:2/18:3) | 1,38      | PS(38:6)              | 1,13      | TG(16:0/18:2/22:5)    | 1,24      | PE(P-18:0/20:5)       | 1,25      | FA(20:3)           | 1,09      |
| PE(18:0/20:4)         | 1,24      | PC(19:0/20:4)      | 1,31      | PE(38:8)              | 1,41      | DG(18:2/20:4)      | 1,37      | TG(18:1/18:1/18:2)    | 1,12      | PE(18:2/18:2)         | 1,24      | TG(16:0/18:1/22:6)    | 1,24      | FA(18:3)           | 1,08      |
| PI(18:1/20:4)         | 1,24      | PC(17:1/20:4)      | 1,31      | PC(17:0/20:4)         | 1,41      | TG(18:1/22:4)      | 1,37      | TG(18:1/18:2/20:1)    | 1,11      | TG(18:1/18:2/22:4)    | 1,24      | FAHFA(16:2/18:1)      | 1,24      | PC(18:0/22:4)      | 1,08      |
| PtOH(36:1)            | 1,24      | PI(17:0/20:4)      | 1,30      | PC(20:0/20:4)         | 1,37      | PC(35:2)           | 1,36      | PC(18:1/18:2)         | 1,11      | TG(16:0/22:5/22:5)    | 1,20      | FAHFA(18:2/18:2) FAHF | 1,21      | PC(18:3/20:4)      | 1,07      |
| LPE(16:0)             | 1,22      | PI(18:1/20:4)      | 1,29      | PC(19:0/20:4)         | 1,37      | PC(19:0/20:4)      | 1,36      | PC(O-41:2)            | 1,11      | PC(O-41:2)            | 1,20      | FAHFA(18:3/18:1)      | 1,19      | TG(16:1/18:2/18:2) | 1,07      |
| PC(35:2)              | 1,21      | FA(20:3)           | 1,28      | PE(18:0/20:4)         | 1,37      | PE(16:0/20:5)      | 1,36      | CE(20:4)              | 1,11      | DG(16:0/22:6)         | 1,17      | FAHFA(18:3/18:1)      | 1,19      | CE(22:5)           | 1,07      |
| PE(40:6)              | 1,21      | PE(19:0/20:4)      | 1,27      | PC(19:0/20:4)         | 1,36      | FA(20:5+0)         | 1,35      | TG(16:0/18:2/18:3)    | 1,11      | DG(18:0/20:4)         | 1,17      | DG(16:0/22:6)         | 1,17      | PC(20:2/20:4)      | 1,04      |
| PC(20:1/20:4)         | 1,20      | PE(18:0/20:4)      | 1,27      | TG(16:0/18:1/22:6)    | 1,34      | PC(P-18:1/18:2)    | 1,35      | CE(18:1)              | 1,10      | TG(16:0/18:2/20:5)    | 1,16      | PI(18:1/20:4)         | 1,17      | DG(18:2/18:2)      | 1,04      |
| PC(20:0/20:4)         | 1,20      | PC(17:0/18:2)      | 1,26      | DG(18:2/22:6)         | 1,33      | TG(18:1/18:2/18:2) | 1,35      | LPC(20:4)             | 1,09      | PC(20:0/20:4)         | 1,14      | PI(18:0/22:6)         | 1,17      | PI(18:1/20:4)      | 1,01      |
| PE(19:0/20:4)         | 1,19      | PC(40:5)           | 1,26      | PC(40:4)              | 1,31      | TC(18:2/18:2/18:3) | 1,34      | PC(20:0/20:4)         | 1,08      | PC(20:0/20:4)         | 1,13      | PE(36:3)              | 1,17      | PE(38:7)           | 1,01      |
| PG(18:2/22:6)         | 1,19      | FAHFA(18:1/20:3)   | 1,25      | TG(18:0/18:2/22:5)    | 1,31      | PE(38:7)           | 1,34      | TG(18:1/18:2/18:2)    | 1,08      | TG(16:1/18:2/18:3)    | 1,10      | PE(18:0/20:5)         | 1,17      | PS(40:6)           | 1,00      |
| PC(38:4)              | 1,18      | TG(16:0/22:5/22:5) | 1,24      | FA(22:6)              | 1,30      | PE(P-18:0/20:5)    | 1,44      | TG(16:0/20:1/20:2)    | 1,07      | TG(16:0/18:1/22:5)    | 1,10      | PC(18:3/20:4)         | 1,15      | TG(16:0/22:6/22:6) | 1,00      |
| PC(37:2)              | 1,18      | PE(35:2)           | 1,24      | LPE(16:0)             | 1,30      | PE(P-18:0/22:4)    | 1,32      | FA(21:5)              | 1,07      | PS(38:6)              | 1,10      | PE(18:0/20:3)         | 1,15      |                    |           |
| PC(20:2/20:4)         | 1,18      | PE(18:0/22:6)      | 1,23      | PE(17:0/20:4)         | 1,29      | FA(18:2+0)         | 1,31      | PE(19:0/20:4)         | 1,07      | PE(35:2)              | 1,09      | TG(18:2/18:2/18:3)    | 1,14      |                    |           |
| LPE(16:0)             | 1,18      | FA(20:4+0)         | 1,23      | PE(17:0/20:4)         | 1,29      | TG(16:0/18:2/18:2) | 1,28      | PC(37:2)              | 1,06      | PC(37:2)              | 1,07      | FA(20:5+0)            | 1,14      |                    |           |
| PC(15:0/18:2)         | 1,16      | PS(36:4)           | 1,23      | LPE(16:0)             | 1,29      | TG(18:0/18:1/20:4) | 1,27      | TG(18:1/18:2/22:4)    | 1,06      | PC(18:2/18:3)         | 1,05      | PC(18:2/20:5)         | 1,12      |                    |           |
| PE(35:2)              | 1,16      | PE(36:3)           | 1,21      | CE(20:4)              | 1,29      | TG(16:0/16:0/22:5) | 1,27      | FA(18:2+0)            | 1,05      | PC(18:2/19:0)         | 1,05      | FAHFA(18:0/18:3)      | 1,12      |                    |           |
| LPC(16:1)             | 1,15      | FA(22:5)           | 1,21      | DG(16:0/22:6)         | 1,27      | CE(20:4)           | 1,26      | PC(36:3)              | 1,05      | PC(14:0/14:0)         | 1,04      | PC(18:0/20:5)         | 1,11      |                    |           |
| PC(18:0/22:4)         | 1,15      | TG(18:2/20:5/22:6) | 1,21      | PC(34:3)              | 1,27      | PE(18:0/20:5)      | 1,26      | FA(18:3+0)            | 1,05      | TG(18:2/18:3/18:3)    | 1,04      | TG(18:1/18:2/18:3)    | 1,11      |                    |           |
| AcCar(16:0)           | 1,15      | LPE(18:0)          | 1,21      | PE(19:0/20:4)         | 1,26      | PC(17:0/20:4)      | 1,24      | TG(16:0/18:2/18:4)    | 1,05      | TG(18:0/18:1/20:4)    | 1,04      | TG(18:0/18:2/22:5)    | 1,10      |                    |           |
| LPE(18:0)             | 1,14      | PS(40:8)           | 1,20      | CE(18:1)              | 1,26      | TG(16:0/18:2/22:4) | 1,24      | LPC(16:1)             | 1,04      | PC(19:0/20:4)         | 1,01      | TG(16:0/18:2/18:3)    | 1,10      |                    |           |
| PC(18:1/20:4)         | 1,12      | TG(18:2/18:3/22:6) | 1,20      | PE(36:4)              | 1,25      | CE(18:1)           | 1,23      | FA(18:2+0)            | 1,04      |                       |           | PI(18:0/20:3)         | 1,10      |                    |           |
| PE(17:0/18:2)         | 1,11      | PC(20:3/20:4)      | 1,20      | PC(18:0/22:4)         | 1,23      | TG(18:1/18:2/18:3) | 1,22      | PE(34:3)              | 1,03      |                       |           | FA(22:6)              | 1,10      |                    |           |
| Cer-NS(d20:2/23:0)    | 1,10      | PI(40:7)           | 1,20      | PG(22:6/22:6)         | 1,23      | PS(36:4)           | 1,21      | FA(18:4)              | 1,03      |                       |           | PE(18:1/18:2)         | 1,09      |                    |           |
| Cer-NS(d18:1/25:1)    | 1,09      | PC(18:1/18:2)      | 1,20      | TG(18:0/18:2/22:6)    | 1,23      | TG(14:0/18:2/18:2) | 1,21      | PE(36:3)              | 1,03      |                       |           | PI(18:0/22:5)         | 1,09      |                    |           |
| PC(15:0/22:6)         | 1,07      | FA(22:6)           | 1,20      | TG(16:0/18:2/22:6)    | 1,22      | PC(38:4)           | 1,21      | PE(38:3)              | 1,03      |                       |           | PE(17:2/22:5)         | 1,08      |                    |           |
| LPE(18:1)             | 1,07      | PC(16:0/20:5)      | 1,20      | PE(19:0/20:4)         | 1,22      | CE(20:5)           | 1,20      | TG(18:1/18:2/18:3)    | 1,03      |                       |           | TG(16:0/18:2/22:6)    | 1,08      |                    |           |
| PC(40:4)              | 1,06      | FA(22:4+0)         | 1,20      | TG(16:1/18:2/18:2)    | 1,22      | PS(P-20:0/18:0)    | 1,19      | PE(17:0/20:4)         | 1,02      |                       |           | TG(18:0/18:2/22:6)    | 1,07      |                    |           |
| PI(18:1/20:4)         | 1,04      | TG(16:0/18:2/20:5) | 1,19      | PC(17:0/20:4)         | 1,22      | PE(16:1/20:4)      | 1,18      | FA(22:4+0)            | 1,02      |                       |           | PG(18:2/22:6)         | 1,06      |                    |           |
| PS(40:8)              | 1,04      | PC(18:0/22:5)      | 1,19      | PE(36:5)              | 1,19      | TG(18:2/22:6/22:6) | 1,18      | TG(16:1/18:2/18:3)    | 1,02      |                       |           | FAHFA(18:2/18:2)      | 1,06      |                    |           |
| CE(18:0)              | 1,04      | TG(18:2/18:2/20:5) | 1,19      | DG(18:2/20:4)         | 1,18      | PC(O-18:1/20:4)    | 1,18      | PC(36:6)              |           |                       |           |                       |           |                    |           |



Supplementary Table 3 Liver VIP proteins

| ENIL vs control |           | PNIL vs control |           | ENILOV vs control |           | PNILOV vs control |           | PNIL vs ENIL |           | ENILOV vs ENIL |           | ENILOV vs PNILOV |           | PNILOV vs PNIL |           |
|-----------------|-----------|-----------------|-----------|-------------------|-----------|-------------------|-----------|--------------|-----------|----------------|-----------|------------------|-----------|----------------|-----------|
| Protein name    | VIP score | Protein name    | VIP score | Protein name      | VIP score | Protein name      | VIP score | Protein name | VIP score | Protein name   | VIP score | Protein name     | VIP score | Protein name   | VIP score |
| Cyp17a1         | 3,93      | Psat1           | 3,58      | Acot1             | 2,45      | Asns              | 3,17      | Phgdh        | 3,46      | Acot1          | 1,86      | Phgdh            | 3,35      | Pdcd11         | 3,14      |
| Cyp2b2          | 3,86      | Asns            | 3,55      | Cyp2b2            | 2,39      | Psat1             | 3,16      | Psat1        | 3,18      | Asns           | 3,18      | Epb411           | 3,03      |                |           |
| Nudt14          | 3,49      | Phgdh           | 3,50      | Cyp17a1           | 2,34      | Acot1             | 3,09      | Asns         | 2,85      | Kcnab3         | 2,93      | Ngp              | 2,97      |                |           |
| Farp1           | 3,37      | A2m             | 2,84      | Pex11a            | 2,33      | Mt1m              | 3,06      | LOC100360095 | 2,71      | Pdcd11         | 2,90      | Sdc4             | 2,94      |                |           |
| CAT2            | 3,35      | Srp14           | 2,79      | Vnn1              | 2,29      | Pdcd11            | 2,90      | A2m          | 2,52      | Rnaset2        | 2,88      | Ptgfrn           | 2,85      |                |           |
| Abhd16a         | 2,62      | Fdft1           | 2,79      | Acmsd             | 2,24      | Me2               | 2,88      | Cyp3a9       | 2,41      | Ssca1          | 2,81      | Ppp1r14b         | 2,80      |                |           |
| Kng1            | 2,13      | Sqle            | 2,72      | Nubp2             | 2,10      | Phgdh             | 2,85      | Aco1         | 2,40      | Psat1          | 2,75      | Pla2g15          | 2,77      |                |           |
| Rala            | 2,07      | Mt1m            | 2,70      | Srp19             | 2,01      | A2m               | 2,84      | Sqle         | 2,25      | Mt1            | 2,70      | Nup54            | 2,76      |                |           |
| S100a9          | 1,92      | Cdo1            | 2,63      | CD36.FAT          | 1,98      | Fdft1             | 2,74      | Cdo1         | 2,21      | Ppp1r14b       | 2,57      | Hgfac            | 2,76      |                |           |
| Fdft1           | 1,78      | Tm7sf2          | 2,58      | Crat              | 1,97      | Mt1               | 2,71      | Slc3a2       | 2,15      | Ybx3           | 2,53      | Luc7l3           | 2,69      |                |           |
| Rbp4            | 1,73      | Ptcd3           | 2,58      | Sqle              | 1,97      | Slc4a4            | 2,69      | Hmox1        | 2,11      | Ptcd3          | 2,49      | Pex11a           | 2,66      |                |           |
| Kng1l1          | 1,68      | Fads1           | 2,57      | Slc4a4            | 1,73      | Ddx21             | 2,67      | Fgl1         | 2,07      | Epb411         | 2,49      | Slc11a1          | 2,65      |                |           |
| Atp5l           | 1,65      | Plin2           | 2,55      | Nudt14            | 1,67      | Cpsf3             | 2,65      | Acacb        | 2,05      | Smagp          | 2,43      | CAT2             | 2,60      |                |           |
| Arl8b           | 1,62      | Cyp3a9          | 2,54      | Tmed4             | 1,61      | Plin2             | 2,62      | Tm7sf2       | 2,05      | Ngp            | 2,40      | Mrps2            | 2,58      |                |           |
| Idi1            | 1,51      | Hsd17b7         | 2,54      | Cyp4a10           | 1,58      | Cyp17a1           | 2,60      | Hsd17b7      | 2,03      | Tmx1           | 2,40      | Tmx1             | 2,49      |                |           |
| Ergic1          | 1,51      | Vnn1            | 2,51      | Aldh1a1           | 1,47      | Hao2              | 2,57      | Elov15       | 2,02      | Sdc4           | 2,38      | Eif4e2           | 2,49      |                |           |
| Arf6            | 1,50      | Idi1            | 2,50      | Acat2             | 1,34      | Kcnab3            | 2,56      | Kng1         | 1,97      | Slc11a1        | 2,37      | Ehd2             | 2,49      |                |           |
| Plbd1           | 1,47      | Cyp51a1         | 2,46      | Ube2r2            | 1,33      | Lamtor2           | 2,56      | Cyp51a1      | 1,96      | Inpp1          | 2,34      | Hdac2            | 2,46      |                |           |
| Acat1           | 1,47      | Hao2            | 2,40      | Tm7sf2            | 1,28      | Vnn1              | 2,55      | Oat          | 1,95      | Cyp3a9         | 2,31      | Pofut1           | 2,46      |                |           |
| Hmgcs1          | 1,46      | Cyp2b2          | 2,38      | Fdps              | 1,27      | Tgolin2           | 2,53      | Ptcd3        | 1,95      | Hmox1          | 2,30      | Ppfbp2           | 2,43      |                |           |
| Hmgcs2          | 1,43      | Acacb           | 2,37      | Fabp5             | 1,24      | Cyp3a9            | 2,53      | Kng1l1       | 1,91      | Mocs2          | 2,29      | Unc45a           | 2,42      |                |           |
| Rps28           | 1,42      | Lss             | 2,36      | Gpd2              | 1,24      | Ptcd3             | 2,44      | CAT2         | 1,91      | Kpna6          | 2,29      | Fscn1            | 2,37      |                |           |
| Gnb2            | 1,35      | Sec24b          | 2,31      | Mvk               | 1,23      | Pex11a            | 2,43      | Rpl22l2      | 1,90      | Nubp2          | 2,26      | Ugcc1            | 2,37      |                |           |
| Stat3           | 1,34      | Hmox1           | 2,31      | Eci1              | 1,21      | Srp14             | 2,43      | Akr1c1       | 1,89      | Itgb2          | 2,26      | Sh3gl1           | 2,35      |                |           |
| Acat2           | 1,33      | Nags            | 2,27      | Ehhadh            | 1,19      | Epb411            | 2,43      | Mmab         | 1,86      | Clic2          | 2,25      | Plod3            | 2,34      |                |           |
| Fads2           | 1,32      | Smarce1         | 2,24      | Acsc2             | 1,17      | Cdo1              | 2,43      | Nags         | 1,86      | Tpd52          | 2,24      | Kti12            | 2,33      |                |           |
| Mvd             | 1,31      | Nup35           | 2,22      | Acot2             | 1,17      | Obp3              | 2,42      | Lss          | 1,85      | Hgfac          | 2,22      | Hn1              | 2,29      |                |           |
| Ada             | 1,31      | Rcc2            | 2,20      | Nnmt              | 1,14      | Fip1l1            | 2,40      | Hao2         | 1,83      | Marco          | 2,21      | Them6            | 2,27      |                |           |
| Mrps27          | 1,30      | Zfp259          | 2,19      | Dhcr24            | 1,12      | Dysf              | 2,40      | Abilim1      | 1,81      | Tmx3           | 2,20      | LOC100911860     | 2,20      |                |           |
| Tmem176b        | 1,30      | Mvd             | 2,17      | Hmgcs1            | 1,09      | Hmox1             | 2,40      | Obp3         | 1,78      | Ankrd28        | 2,20      | Srp72            | 2,16      |                |           |
| Fdps            | 1,14      | Abilim1         | 2,17      | Ephx2             | 1,08      | Engase            | 2,38      | Cyp2c12      | 1,77      | Tm6sf2         | 2,20      | Ppip5k2          | 2,13      |                |           |
| Cd163           | 1,14      | Shc1            | 2,13      | Cyp4a14           | 1,08      | Sdc4              | 2,38      | Entpd8       | 1,76      | Epb4.1l5       | 2,19      | Igj              | 2,09      |                |           |
| Dhcr24          | 1,13      | Cyp2c12         | 2,13      | Ech1              | 1,04      | Rwdd1             | 2,38      | Cyp17a1      | 1,75      | Ugcc1          | 2,16      | Ppp3ca           | 2,08      |                |           |
| Ban1            | 1,12      | Mvk             | 2,12      | Slc11a1           | 2,38      | Sec24b            | 2,38      | Sec24b       | 1,72      | Rps6ka1        | 2,15      | Aqp1             | 2,05      |                |           |
| Fasn            | 1,11      | Oat             | 2,09      | Abilim3           | 2,37      | Msmo1             | 1,71      |              |           | Edc4           | 2,14      | Sars2            | 2,02      |                |           |
| Sec16a          | 1,10      | Gpd2            | 2,05      | CD36.FAT          | 2,35      | Lipc              | 1,70      |              |           | Sart3          | 2,14      | Spns1            | 2,02      |                |           |
| Mvk             | 1,09      | Taok3           | 2,03      | Abilim1           | 2,35      | Igf1              | 1,65      |              |           | Acacb          | 2,10      | Sbf1             | 1,92      |                |           |
| Snap23          | 1,05      | Creld2          | 2,01      | Farp1             | 2,33      | Sh3gl1            | 1,61      |              |           | Fndc3b         | 2,08      | Rac2             | 1,87      |                |           |
| Gmppa           | 1,05      | Obp3            | 2,00      | Ssca1             | 2,31      | Golga5            | 1,60      |              |           | Ctsf           | 2,07      | Cdk5             | 1,82      |                |           |
| Fth1            | 1,02      | Acat2           | 1,95      | Sqle              | 2,31      | Aqp1              | 1,60      |              |           | Yes1           | 2,06      | Chtop            | 1,75      |                |           |
|                 |           | Fdps            | 1,92      | Prpf40a           | 2,30      | Mvk               | 1,59      |              |           | Phkg2          | 2,06      | Mrpl27           | 1,60      |                |           |
|                 |           | Aldh1a1         | 1,87      | Acot7             | 2,28      | Gpt2              | 1,53      |              |           | Commdd6        | 2,06      | Ptms             | 1,55      |                |           |
|                 |           | Mybbp1a         | 1,86      | Ppp1r14b          | 2,28      | Dhcr7             | 1,53      |              |           | Strn           | 2,04      | Dnajc7           | 1,52      |                |           |
|                 |           | Dhcr7           | 1,82      | Nol6              | 2,27      | Etnppl            | 1,50      |              |           | Tomm34         | 2,02      | Acot7            | 1,50      |                |           |
|                 |           | Cyp2d4          | 1,79      | Fads1             | 2,27      | Lgmn              | 1,50      |              |           | Hn1l           | 2,01      | Wbp2             | 1,45      |                |           |
|                 |           | Tmx1            | 1,78      | Tm7sf2            | 2,26      | Cyp2d4            | 1,49      |              |           | Fads1          | 2,01      | Gstm3            | 1,40      |                |           |
|                 |           | Kng1l1          | 1,78      | Xpot              | 2,26      | ifitm3            | 1,48      |              |           | Fip1l1         | 1,99      | Saa4             | 1,39      |                |           |
|                 |           | Gpt2            | 1,77      | Ptgfrn            | 2,26      | Creld2            | 1,46      |              |           | rNPT4s         | 1,98      | Ghitm            | 1,37      |                |           |
|                 |           | Ppt1            | 1,70      | Emc10             | 2,26      | RGD1310769        | 1,44      |              |           | Ikbkap         | 1,98      | SdhL.Lrrp1       | 1,36      |                |           |
|                 |           | Hmgcs1          | 1,67      | Exosc4            | 2,26      | LOC298116         | 1,43      |              |           | Pofut1         | 1,97      | Fam210a          | 1,35      |                |           |
|                 |           | Akr1c1          | 1,66      | Clic2             | 2,25      | Psph              | 1,42      |              |           | Supt6h         | 1,97      | Slc22a7          | 1,34      |                |           |
|                 |           | Kng1            | 1,65      | Slil              | 2,24      | Acat2             | 1,41      |              |           | Lztf1l         | 1,95      | Dhrs7l1          | 1,33      |                |           |
|                 |           | Cars            | 1,61      | Pglyrp2           | 2,24      | Fdps              | 1,40      |              |           | Unc45a         | 1,93      | Cstb             | 1,33      |                |           |
|                 |           | Pklr            | 1,59      | Crat              | 2,24      | Bhmt              | 1,39      |              |           | Gorasp1        | 1,92      | Sec61b           | 1,33      |                |           |
|                 |           | Me1             | 1,58      | Hdac2             | 2,23      | Tmem11            | 1,38      |              |           | Exosc4         | 1,90      | Qsox1            | 1,33      |                |           |
|                 |           | LOC298116       | 1,57      | Nup54             | 2,23      | Cars              | 1,36      |              |           | Itfg3          | 1,88      | Marcks           | 1,32      |                |           |
|                 |           | Psph            | 1,54      | C1qa              | 2,21      | Ppt1              | 1,36      |              |           | Kti12          | 1,87      | F11r             | 1,32      |                |           |
|                 |           | Cyp4a14         | 1,53      | Serpina3l         | 2,21      | Ipo4              | 1,33      |              |           | Pde2a          | 1,87      | Cyflp1           | 1,31      |                |           |
|                 |           | LOC100912604    | 1,51      | Qsox2             | 2,21      | RGD1566134        | 1,33      |              |           | RGD1311805     | 1,86      | Psmb7            | 1,30      |                |           |
|                 |           | Fkbp11          | 1,50      | Tm6sf2            | 2,20      | Stat3             | 1,32      |              |           | S100a8         | 1,86      | Ube2v2           | 1,30      |                |           |
|                 |           | Dhrs7l1         | 1,50      | Sec24b            | 2,20      | Hk3               | 1,32      |              |           | Plod3          | 1,85      | Lamtor1          | 1,29      |                |           |
|                 |           | RGD1566134      | 1,49      | Acacb             | 2,18      | Fam213b           | 1,31      |              |           | Nup54          | 1,85      | Apoc2            | 1,29      |                |           |

|  |  |          |      |  |  |              |      |              |      |  |  |              |      |              |      |
|--|--|----------|------|--|--|--------------|------|--------------|------|--|--|--------------|------|--------------|------|
|  |  | Dkc1     | 1,48 |  |  | Rae1         | 2,18 | Pck2         | 1,30 |  |  | Rab21        | 1,85 | Ndufa7l      | 1,28 |
|  |  | Lipa     | 1,48 |  |  | Gpd2         | 2,18 | LOC100912604 | 1,29 |  |  | Oat          | 1,83 | Reep5        | 1,28 |
|  |  | Acss2    | 1,47 |  |  | Luc7l3       | 2,17 | Yars         | 1,28 |  |  | Rac2         | 1,82 | Magt1        | 1,28 |
|  |  | Pck2     | 1,44 |  |  | Scyl2        | 2,16 | C5           | 1,28 |  |  | Pnkd         | 1,82 | Ggct         | 1,25 |
|  |  | Yars     | 1,42 |  |  | Smagp        | 2,15 | S100a9       | 1,27 |  |  | Creld2       | 1,80 | Apoe         | 1,24 |
|  |  | Bhmt     | 1,42 |  |  | Cyp51a1      | 2,14 | Gpd2         | 1,27 |  |  | Them6        | 1,80 | Atox1        | 1,22 |
|  |  | Sars     | 1,42 |  |  | Itgav        | 2,14 | Me1          | 1,26 |  |  | Hn1          | 1,79 | Fam98a       | 1,22 |
|  |  | Ctsd     | 1,41 |  |  | Serpind1     | 2,14 | Mgst3        | 1,26 |  |  | Akap2        | 1,78 | Ccs          | 1,21 |
|  |  | ste2     | 1,41 |  |  | Hsd17b7      | 2,12 | Dhrs7l1      | 1,25 |  |  | Yif1b        | 1,78 | Rps27        | 1,21 |
|  |  | lars     | 1,39 |  |  | CAT2         | 2,09 | Umps         | 1,25 |  |  | Tsr1         | 1,75 | Myo1c        | 1,18 |
|  |  | Umps     | 1,38 |  |  | Gng10        | 2,08 | Fga          | 1,22 |  |  | Sdr39u1      | 1,75 | Pfdn2        | 1,18 |
|  |  | Nhp2     | 1,38 |  |  | Lsm4         | 2,07 | Lgals3       | 1,22 |  |  | Mrps23       | 1,74 | LOC100361144 | 1,17 |
|  |  | Dak      | 1,35 |  |  | Zfp259       | 2,06 | Nhp2         | 1,21 |  |  | Cd163        | 1,72 | Ppp2ca       | 1,17 |
|  |  | Lgals3   | 1,35 |  |  | Mocs2        | 2,06 | Pklr         | 1,20 |  |  | Ppip5k2      | 1,69 | Frrs1        | 1,17 |
|  |  | Smpd1    | 1,34 |  |  | Ttc1         | 2,05 | Slc25a21     | 1,20 |  |  | Ube2r2       | 1,68 | Snap23       | 1,15 |
|  |  | Dhcr24   | 1,34 |  |  | RGD1311805   | 2,05 | Fmo4         | 1,19 |  |  | Zfp1         | 1,66 | Rbm8a        | 1,15 |
|  |  | Ephx2    | 1,33 |  |  | Dhrs7l1      | 2,04 | C4bpa        | 1,19 |  |  | Sars2        | 1,63 | Eif3f        | 1,15 |
|  |  | Lars     | 1,33 |  |  | Rcc2         | 2,04 | Fgg          | 1,19 |  |  | Gstm3        | 1,61 | Sec62        | 1,15 |
|  |  | Gars     | 1,32 |  |  | Itgb2        | 2,04 | Sco1b2       | 1,19 |  |  | Apoc2        | 1,58 | Coq9         | 1,13 |
|  |  | Hsd17b13 | 1,32 |  |  | LOC100912478 | 2,03 | Dkc1         | 1,18 |  |  | Nme3         | 1,57 | Rps29        | 1,12 |
|  |  | Fbl      | 1,28 |  |  | Tomm34       | 2,03 | Ptma         | 1,18 |  |  | Ppt1         | 1,52 | Shpk         | 1,12 |
|  |  | Gpi      | 1,28 |  |  | Oat          | 2,02 | C4a          | 1,18 |  |  | LOC501233    | 1,51 | Hsd17b8      | 1,12 |
|  |  | Nop58    | 1,27 |  |  | Prorsd1      | 2,01 | Aldh1b1      | 1,16 |  |  | Ptgs1        | 1,48 | Slirp        | 1,12 |
|  |  | Galk1    | 1,25 |  |  | LOC298116    | 1,99 | Lipa         | 1,16 |  |  | Cyp2d4       | 1,48 | Nme3         | 1,11 |
|  |  | Dhtkd1   | 1,24 |  |  | Ccdc25       | 1,99 | Serping1     | 1,16 |  |  | Inmt         | 1,45 | Snrnp70      | 1,10 |
|  |  | Serping1 | 1,23 |  |  | Ikkkap       | 1,98 | Ctsd         | 1,15 |  |  | Ces1d        | 1,42 | Uba5         | 1,09 |
|  |  | Inmt     | 1,23 |  |  | Shc1         | 1,98 | ste2         | 1,15 |  |  | Pck2         | 1,42 | Sumo2        | 1,09 |
|  |  | Rdh2     | 1,23 |  |  | Supt6h       | 1,98 | Pafah1b3     | 1,15 |  |  | Nags         | 1,42 | Hsd11b1      | 1,08 |
|  |  | Qprt     | 1,22 |  |  | Pofut1       | 1,98 | Serpina3n    | 1,14 |  |  | Psph         | 1,40 | Mt.cox3      | 1,06 |
|  |  | Nop56    | 1,21 |  |  | Hist1h1a     | 1,97 | LOC299282    | 1,14 |  |  | Golga3       | 1,39 | Tecr         | 1,05 |
|  |  | Cmas     | 1,21 |  |  | Sart3        | 1,97 | Sec23b       | 1,14 |  |  | Cars         | 1,38 | Cltb         | 1,05 |
|  |  | Cfb      | 1,21 |  |  | Hn1l         | 1,96 | Chtop        | 1,14 |  |  | Atxn10       | 1,38 | Lin7a        | 1,04 |
|  |  | Nhp2l1   | 1,21 |  |  | Tbcd         | 1,96 | Letmd1       | 1,13 |  |  | Sdhd.Lrrp1   | 1,35 | Rpl23a       | 1,02 |
|  |  | Trim28   | 1,21 |  |  | Slc25a4      | 1,95 | Inmt         | 1,13 |  |  | Fabp5        | 1,34 | Fam175b      | 1,01 |
|  |  | Paics    | 1,20 |  |  | Nags         | 1,93 | Gmppa        | 1,13 |  |  | Apoa2        | 1,34 | Selt         | 1,01 |
|  |  | Nars     | 1,20 |  |  | Fam50a       | 1,93 | Gck          | 1,13 |  |  | Fmo1         | 1,33 |              |      |
|  |  | Agar     | 1,20 |  |  | Xrcc5        | 1,92 | Pir          | 1,13 |  |  | Ttr          | 1,33 |              |      |
|  |  | Ergic1   | 1,18 |  |  | Hgfac        | 1,92 | Fgb          | 1,13 |  |  | Bhmt         | 1,33 |              |      |
|  |  | Itih4    | 1,18 |  |  | Grn          | 1,91 | Rbm3         | 1,13 |  |  | Dnajc7       | 1,30 |              |      |
|  |  | Ncl      | 1,17 |  |  | Uqcc1        | 1,90 | Ebp          | 1,12 |  |  | LOC100912604 | 1,29 |              |      |
|  |  | Cyp2c11  | 1,17 |  |  | Serpib1a     | 1,90 | Cth          | 1,12 |  |  | Acot13       | 1,29 |              |      |
|  |  | Papss2   | 1,16 |  |  | Lss          | 1,90 | Fam114a1     | 1,12 |  |  | Hsd17b8      | 1,27 |              |      |
|  |  | Sqrdl    | 1,16 |  |  | Commd7       | 1,90 | Sult1e1      | 1,11 |  |  | Acox1        | 1,27 |              |      |
|  |  | C4a      | 1,13 |  |  | Fscn1        | 1,89 | Wars         | 1,11 |  |  | Smpd1        | 1,27 |              |      |
|  |  | Ass1     | 1,13 |  |  | Kti12        | 1,89 | Sars         | 1,11 |  |  | Mgst3        | 1,27 |              |      |
|  |  | Snrnp70  | 1,12 |  |  | Gorasp1      | 1,89 | Itih4        | 1,10 |  |  | Col1a2       | 1,26 |              |      |
|  |  | Aars     | 1,12 |  |  | Pde2a        | 1,88 | Lars         | 1,10 |  |  | Serpina3k    | 1,26 |              |      |
|  |  | Cyp1a2   | 1,11 |  |  | Prmt1        | 1,87 | Acss2        | 1,09 |  |  | Wars         | 1,25 |              |      |
|  |  | Ttc36    | 1,11 |  |  | Sars2        | 1,85 | Papss2       | 1,09 |  |  | Alg3         | 1,24 |              |      |
|  |  | Ebp      | 1,11 |  |  | Trappc8      | 1,84 | lars         | 1,09 |  |  | Fam98a       | 1,23 |              |      |
|  |  | Ugdh     | 1,11 |  |  | Fdps         | 1,83 | Ttr          | 1,08 |  |  | Ttll12       | 1,23 |              |      |
|  |  | Hadhb    | 1,11 |  |  | Tcf25        | 1,83 | Ddc          | 1,08 |  |  | Gpt          | 1,22 |              |      |
|  |  | Acat1    | 1,10 |  |  | Pnkd         | 1,82 | Pign         | 1,08 |  |  | Acadsb       | 1,21 |              |      |
|  |  | Hadha    | 1,10 |  |  | Pla2g15      | 1,82 | Vps13c       | 1,08 |  |  | Enpp3        | 1,21 |              |      |
|  |  | Cyb5b    | 1,10 |  |  | Nudt14       | 1,80 | Banf1        | 1,08 |  |  | Qsox1        | 1,21 |              |      |
|  |  | Cth      | 1,09 |  |  | Idi1         | 1,80 | Eef1e1       | 1,07 |  |  | Ube2g1       | 1,19 |              |      |
|  |  | Sult1e1  | 1,09 |  |  | Akap2        | 1,79 | Dnph1        | 1,07 |  |  | Sds          | 1,19 |              |      |
|  |  | Eprs     | 1,09 |  |  | Trmt1        | 1,78 | Ybx1         | 1,07 |  |  | Fndc3a       | 1,19 |              |      |
|  |  | Gmppb    | 1,09 |  |  | Spryd7       | 1,78 | Tpr          | 1,07 |  |  | Mpc1         | 1,18 |              |      |
|  |  | Mgst3    | 1,09 |  |  | Smarce1      | 1,77 | Gpt          | 1,06 |  |  | Mat2a        | 1,18 |              |      |
|  |  | Slco1b2  | 1,08 |  |  | Cyp2d4       | 1,77 | Cyp1a2       | 1,06 |  |  | Ilf3         | 1,18 |              |      |
|  |  | Ldha     | 1,08 |  |  | Tsr1         | 1,76 | Hp           | 1,06 |  |  | Sars         | 1,18 |              |      |
|  |  | Cbs      | 1,08 |  |  | Ankrd28      | 1,76 | Dbi          | 1,06 |  |  | A1i3         | 1,17 |              |      |
|  |  | Ufl1     | 1,08 |  |  | Aldh1a1      | 1,75 | Fkbp11       | 1,06 |  |  | Cstb         | 1,17 |              |      |
|  |  | Npm1     | 1,04 |  |  | Lztf1        | 1,75 | C9           | 1,05 |  |  | Adprhl2      | 1,17 |              |      |
|  |  | Ppp1ca   | 1,04 |  |  | Rad21        | 1,75 | Snap29       | 1,04 |  |  | lars         | 1,17 |              |      |

|  |              |      |  |              |      |         |      |  |              |      |  |
|--|--------------|------|--|--------------|------|---------|------|--|--------------|------|--|
|  | Gnmt         | 1,04 |  | LOC100911860 | 1,74 | Cyb5f3  | 1,04 |  | Fam210a      | 1,16 |  |
|  | Gpt          | 1,04 |  | Cdc73        | 1,71 | Pon3    | 1,04 |  | Aldh4a1      | 1,16 |  |
|  | Eif4a1       | 1,01 |  | RGD1566134   | 1,71 | Dhtkd1  | 1,04 |  | Psap         | 1,16 |  |
|  | Hnrnpa1      | 1,01 |  | Zfp1         | 1,70 | Arl8b   | 1,03 |  | Glul         | 1,16 |  |
|  | Hpd          | 1,01 |  | Gopc         | 1,70 | Cad     | 1,03 |  | Pyclr1       | 1,16 |  |
|  | LOC100365676 | 1,00 |  | Ppip5k2      | 1,69 | Mrps27  | 1,02 |  | Ttc36        | 1,16 |  |
|  |              |      |  | Nolc1        | 1,69 | Lamtor3 | 1,02 |  | Ivd          | 1,15 |  |
|  |              |      |  | Ppt1         | 1,68 | Reep5   | 1,02 |  | Mat2b        | 1,14 |  |
|  |              |      |  | Taok3        | 1,65 | Pck1    | 1,02 |  | Arpc5l       | 1,14 |  |
|  |              |      |  | Abhd16a      | 1,65 | Cyp2t1  | 1,01 |  | Nubp1        | 1,13 |  |
|  |              |      |  | Cop2         | 1,64 | Enpp3   | 1,01 |  | Abhd5        | 1,13 |  |
|  |              |      |  | Mrps23       | 1,63 | Fmo1    | 1,01 |  | Nars         | 1,12 |  |
|  |              |      |  | Crip1        | 1,62 | Marcks  | 1,01 |  | Sh3bgrl      | 1,12 |  |
|  |              |      |  | Exoc5        | 1,62 | Gys2    | 1,01 |  | Lars         | 1,12 |  |
|  |              |      |  | Tax1bp3      | 1,62 | Gulo    | 1,01 |  | Kmo          | 1,12 |  |
|  |              |      |  | Mybbp1a      | 1,61 | Chchd6  | 1,01 |  | Gnl1         | 1,12 |  |
|  |              |      |  | Inmt         | 1,60 | Xpnpep2 | 1,01 |  | Tmem14c      | 1,12 |  |
|  |              |      |  | Dhcr24       | 1,59 | Eif4g2  | 1,00 |  | Apoa1        | 1,11 |  |
|  |              |      |  | Wbp2         | 1,56 | Rbm8a   | 1,00 |  | Prkaa1       | 1,11 |  |
|  |              |      |  | Mvd          | 1,55 |         |      |  | Gmppa        | 1,11 |  |
|  |              |      |  | Mvk          | 1,55 |         |      |  | Srd5a1       | 1,11 |  |
|  |              |      |  | Rdh2         | 1,54 |         |      |  | Hadh         | 1,11 |  |
|  |              |      |  | Cyp2c11      | 1,54 |         |      |  | Pxmp2        | 1,11 |  |
|  |              |      |  | Ppp3ca       | 1,53 |         |      |  | Decr2        | 1,11 |  |
|  |              |      |  | Hmgcs1       | 1,53 |         |      |  | LOC100361144 | 1,10 |  |
|  |              |      |  | Sds          | 1,52 |         |      |  | Ass1         | 1,10 |  |
|  |              |      |  | Sult1e1      | 1,52 |         |      |  | Dus3l        | 1,10 |  |
|  |              |      |  | Nme3         | 1,52 |         |      |  | Pon3         | 1,09 |  |
|  |              |      |  | Gstm3        | 1,49 |         |      |  | Cad          | 1,09 |  |
|  |              |      |  | Ttr          | 1,47 |         |      |  | Gstm2        | 1,09 |  |
|  |              |      |  | Acat2        | 1,47 |         |      |  | LOC364561    | 1,09 |  |
|  |              |      |  | Ttc36        | 1,47 |         |      |  | Otc          | 1,09 |  |
|  |              |      |  | Gpt2         | 1,45 |         |      |  | Cyp2e1       | 1,09 |  |
|  |              |      |  | Ldhd         | 1,45 |         |      |  | Magt1        | 1,09 |  |
|  |              |      |  | Ass1         | 1,44 |         |      |  | Fads2        | 1,08 |  |
|  |              |      |  | Grsf1        | 1,41 |         |      |  | Eif3f        | 1,08 |  |
|  |              |      |  | Cdk5         | 1,41 |         |      |  | Ces1c        | 1,08 |  |
|  |              |      |  | Sdhd.Lrrp1   | 1,41 |         |      |  | Ndufa7l      | 1,08 |  |
|  |              |      |  | Slc20a2      | 1,40 |         |      |  | Papss2       | 1,07 |  |
|  |              |      |  | Golga3       | 1,40 |         |      |  | Coq9         | 1,07 |  |
|  |              |      |  | Cars         | 1,38 |         |      |  | Puf60        | 1,06 |  |
|  |              |      |  | LOC100912604 | 1,37 |         |      |  | Cat          | 1,06 |  |
|  |              |      |  | Tecr         | 1,37 |         |      |  | Atp5e        | 1,06 |  |
|  |              |      |  | Ephx2        | 1,37 |         |      |  | Eci1         | 1,06 |  |
|  |              |      |  | Dhcr7        | 1,36 |         |      |  | Atp5g3       | 1,05 |  |
|  |              |      |  | Gtpbp3       | 1,35 |         |      |  | LOC287167    | 1,05 |  |
|  |              |      |  | Papss2       | 1,35 |         |      |  | Fdx1         | 1,05 |  |
|  |              |      |  | Dhtkd1       | 1,34 |         |      |  | Ehhadh       | 1,04 |  |
|  |              |      |  | Apoa2        | 1,33 |         |      |  | Tecr         | 1,04 |  |
|  |              |      |  | Smpd1        | 1,33 |         |      |  | Anp32b       | 1,04 |  |
|  |              |      |  | Tgm2         | 1,33 |         |      |  | Fmo5         | 1,04 |  |
|  |              |      |  | Serpina10    | 1,32 |         |      |  | Hpd          | 1,04 |  |
|  |              |      |  | Ces1d        | 1,32 |         |      |  | Rpl10a       | 1,04 |  |
|  |              |      |  | Apoc2        | 1,32 |         |      |  | Xpnpep2      | 1,03 |  |
|  |              |      |  | Alg3         | 1,32 |         |      |  | Acadm        | 1,02 |  |
|  |              |      |  | Ste          | 1,32 |         |      |  | Cyb5a        | 1,02 |  |
|  |              |      |  | Acss2        | 1,31 |         |      |  | Pm20d1       | 1,02 |  |
|  |              |      |  | Bhmt         | 1,31 |         |      |  | Abcf2        | 1,02 |  |
|  |              |      |  | Ndufa7l      | 1,30 |         |      |  | Umps         | 1,02 |  |
|  |              |      |  | Gstm2        | 1,29 |         |      |  | Hint1        | 1,02 |  |
|  |              |      |  | Mrpl27       | 1,28 |         |      |  | Acsl1        | 1,01 |  |
|  |              |      |  | Top1         | 1,28 |         |      |  | Slc25a1      | 1,01 |  |
|  |              |      |  | LOC299282    | 1,28 |         |      |  | Sugct        | 1,01 |  |
|  |              |      |  | Trabd        | 1,28 |         |      |  | Tmem30a      | 1,01 |  |
|  |              |      |  | Sars         | 1,28 |         |      |  | Cyp2t1       | 1,01 |  |
|  |              |      |  | Aldh4a1      | 1,28 |         |      |  | Capza2       | 1,01 |  |

|  |  |  |  |  |              |      |  |  |  |  |       |      |  |
|--|--|--|--|--|--------------|------|--|--|--|--|-------|------|--|
|  |  |  |  |  | Gpt          | 1,26 |  |  |  |  | H3f3c | 1,00 |  |
|  |  |  |  |  | Prodh        | 1,25 |  |  |  |  | Giyat | 1,00 |  |
|  |  |  |  |  | Ptgs1        | 1,24 |  |  |  |  | Psmb7 | 1,00 |  |
|  |  |  |  |  | Slc25a1      | 1,23 |  |  |  |  | Herc4 | 1,00 |  |
|  |  |  |  |  | Hpd          | 1,23 |  |  |  |  |       |      |  |
|  |  |  |  |  | Cbs          | 1,22 |  |  |  |  |       |      |  |
|  |  |  |  |  | Acadsb       | 1,22 |  |  |  |  |       |      |  |
|  |  |  |  |  | Ddc          | 1,22 |  |  |  |  |       |      |  |
|  |  |  |  |  | Iars         | 1,22 |  |  |  |  |       |      |  |
|  |  |  |  |  | Snap23       | 1,22 |  |  |  |  |       |      |  |
|  |  |  |  |  | Asmtl        | 1,22 |  |  |  |  |       |      |  |
|  |  |  |  |  | Gstt3        | 1,22 |  |  |  |  |       |      |  |
|  |  |  |  |  | Anp32e       | 1,21 |  |  |  |  |       |      |  |
|  |  |  |  |  | Dkc1         | 1,21 |  |  |  |  |       |      |  |
|  |  |  |  |  | Hsd17b8      | 1,20 |  |  |  |  |       |      |  |
|  |  |  |  |  | Pck2         | 1,20 |  |  |  |  |       |      |  |
|  |  |  |  |  | LOC100361144 | 1,20 |  |  |  |  |       |      |  |
|  |  |  |  |  | Rpl37a.ps1   | 1,19 |  |  |  |  |       |      |  |
|  |  |  |  |  | Ctsa         | 1,19 |  |  |  |  |       |      |  |
|  |  |  |  |  | Nap1l1       | 1,19 |  |  |  |  |       |      |  |
|  |  |  |  |  | Coq9         | 1,19 |  |  |  |  |       |      |  |
|  |  |  |  |  | Gstm1        | 1,18 |  |  |  |  |       |      |  |
|  |  |  |  |  | Acot13       | 1,18 |  |  |  |  |       |      |  |
|  |  |  |  |  | Nnmt         | 1,17 |  |  |  |  |       |      |  |
|  |  |  |  |  | Gns          | 1,17 |  |  |  |  |       |      |  |
|  |  |  |  |  | Fermt3       | 1,17 |  |  |  |  |       |      |  |
|  |  |  |  |  | Bco2         | 1,17 |  |  |  |  |       |      |  |
|  |  |  |  |  | Lars         | 1,17 |  |  |  |  |       |      |  |
|  |  |  |  |  | Gulo         | 1,17 |  |  |  |  |       |      |  |
|  |  |  |  |  | Pgpep1       | 1,16 |  |  |  |  |       |      |  |
|  |  |  |  |  | Atxn10       | 1,16 |  |  |  |  |       |      |  |
|  |  |  |  |  | Gsta4        | 1,16 |  |  |  |  |       |      |  |
|  |  |  |  |  | Pcna         | 1,16 |  |  |  |  |       |      |  |
|  |  |  |  |  | Ube2v2       | 1,15 |  |  |  |  |       |      |  |
|  |  |  |  |  | Snrpd3       | 1,15 |  |  |  |  |       |      |  |
|  |  |  |  |  | Cpt1a        | 1,15 |  |  |  |  |       |      |  |
|  |  |  |  |  | Hsd12        | 1,15 |  |  |  |  |       |      |  |
|  |  |  |  |  | Cept1        | 1,14 |  |  |  |  |       |      |  |
|  |  |  |  |  | Hsd17b13     | 1,14 |  |  |  |  |       |      |  |
|  |  |  |  |  | Hsd11b1      | 1,13 |  |  |  |  |       |      |  |
|  |  |  |  |  | Cmas         | 1,13 |  |  |  |  |       |      |  |
|  |  |  |  |  | Magt1        | 1,13 |  |  |  |  |       |      |  |
|  |  |  |  |  | Fetub        | 1,13 |  |  |  |  |       |      |  |
|  |  |  |  |  | Fads2        | 1,13 |  |  |  |  |       |      |  |
|  |  |  |  |  | Aldh1l1      | 1,13 |  |  |  |  |       |      |  |
|  |  |  |  |  | Anp32b       | 1,12 |  |  |  |  |       |      |  |
|  |  |  |  |  | Psap         | 1,12 |  |  |  |  |       |      |  |
|  |  |  |  |  | Hexb         | 1,12 |  |  |  |  |       |      |  |
|  |  |  |  |  | Fmo1         | 1,12 |  |  |  |  |       |      |  |
|  |  |  |  |  | Mmaa         | 1,11 |  |  |  |  |       |      |  |
|  |  |  |  |  | Nars         | 1,11 |  |  |  |  |       |      |  |
|  |  |  |  |  | Fbl          | 1,11 |  |  |  |  |       |      |  |
|  |  |  |  |  | Glul         | 1,11 |  |  |  |  |       |      |  |
|  |  |  |  |  | Lamtor1      | 1,11 |  |  |  |  |       |      |  |
|  |  |  |  |  | Pycrl        | 1,11 |  |  |  |  |       |      |  |
|  |  |  |  |  | Gcat         | 1,10 |  |  |  |  |       |      |  |
|  |  |  |  |  | Fkbp11       | 1,10 |  |  |  |  |       |      |  |
|  |  |  |  |  | Cstb         | 1,10 |  |  |  |  |       |      |  |
|  |  |  |  |  | Lclat1       | 1,10 |  |  |  |  |       |      |  |
|  |  |  |  |  | Aass         | 1,10 |  |  |  |  |       |      |  |
|  |  |  |  |  | Fam210a      | 1,10 |  |  |  |  |       |      |  |
|  |  |  |  |  | Mpc1         | 1,10 |  |  |  |  |       |      |  |
|  |  |  |  |  | Cbx1         | 1,09 |  |  |  |  |       |      |  |
|  |  |  |  |  | Mgst3        | 1,09 |  |  |  |  |       |      |  |
|  |  |  |  |  | Vamp8        | 1,09 |  |  |  |  |       |      |  |
|  |  |  |  |  | Sco1         | 1,09 |  |  |  |  |       |      |  |



**Supplementary Table 4** *Metabolic pathways deregulated in the liver in experimental groups.*

| groups                  | n                                               | KEGG pathway                                 | proteins                                                                          | p-value |
|-------------------------|-------------------------------------------------|----------------------------------------------|-----------------------------------------------------------------------------------|---------|
| ENIL vs control         | 40                                              | Terpenoid backbone biosynthesis              | MVD, HMGCS2, HMGCS1, FDPS, MVK, IDI1, ACAT2, ACAT1                                | 0.000   |
|                         |                                                 | Synthesis and degradation of ketone bodies   | HMGCS2, HMGCS1, ACAT2, ACAT1                                                      | 0.000   |
|                         |                                                 | Butanoate metabolism                         | HMGCS2, HMGCS1, ACAT2, ACAT1                                                      | 0.001   |
|                         |                                                 | Valine, leucine and isoleucine degradation   | HMGCS2, HMGCS1, ACAT2, ACAT1                                                      | 0.006   |
| PNIL vs control         | 134                                             | Terpenoid backbone biosynthesis              | MVD, HMGCS1, FDPS, MVK, IDI1, ACAT2, ACAT1                                        | 0.000   |
|                         |                                                 | Propanoate metabolism                        | LDHA, ACACB, ACSS2, ACAT2, ACAT1, HADHA                                           | 0.000   |
|                         |                                                 | Fatty acid metabolism                        | FADS1, PPT1, ACAT2, ACAT1, HADHA, HADHB                                           | 0.006   |
|                         |                                                 | Tryptophan metabolism                        | CYP1A2, ACAT2, ACAT1, HADHA, INMT                                                 | 0.024   |
|                         |                                                 | Butanoate metabolism                         | HMGCS1, ACAT2, ACAT1, HADHA                                                       | 0.038   |
|                         |                                                 | Valine, leucine and isoleucine degradation   | HMGCS1, ACAT2, ACAT1, HADHA, HADHB                                                | 0.036   |
|                         |                                                 | Synthesis and degradation of ketone bodies   | HMGCS1, ACAT2, ACAT1                                                              | 0.047   |
|                         |                                                 | Steroid hormone biosynthesis                 | CYP2B2, CYP2D4, STE2, CYP2C12, CYP1A2, SULT1E1, CYP3A9, CYP2C11, HSD17B7          | 0.000   |
|                         |                                                 | Retinol metabolism                           | ALDH1A1, CYP2B2, CYP2C12, CYP1A2, CYP3A9, CYP2C11                                 | 0.032   |
| Chemical carcinogenesis | MGST3, CYP2B2, CYP2C12, CYP1A2, CYP3A9, CYP2C11 | 0.038                                        |                                                                                   |         |
| ENILOV vs control       | 33                                              | no clusters found                            |                                                                                   |         |
| PNILOV vs control       | 305                                             | Chemical carcinogenesis                      | GSTM1, MGST3, GSTM2, GSTM3, GSTA4, GSTA5, GSTK1, HSD11B1, CYP3A9, CYP2C11         | 0.004   |
|                         |                                                 | Glutathione metabolism                       | GSTM1, MGST3, GSTM2, GSTM3, GSTA4, GSTA5, GSTK1, LOC100912604                     | 0.005   |
|                         |                                                 | Metabolism of xenobiotics by cytochrome P450 | GSTM1, MGST3, GSTM2, GSTM3, GSTA4, GSTA5, GSTK1, HSD11B1                          | 0.013   |
|                         |                                                 | Drug metabolism - cytochrome P450            | GSTM1, MGST3, GSTM2, GSTM3, GSTA4, GSTA5, FMO1, GSTK1                             | 0.013   |
| PNIL vs ENIL            | 147                                             | Pyruvate metabolism                          | ME1, ALDH1B1, PKLR, ACACB, PCK2, ACSS2, ACAT2, PCK1                               | 0.000   |
|                         |                                                 | Glycolysis / Gluconeogenesis                 | GCK, ALDH1B1, HK3, PKLR, PCK2, ACSS2, PCK1                                        | 0.005   |
|                         |                                                 | Steroid hormone biosynthesis                 | CYP17A1, CYP2D4, STE2, CYP2C12, CYP1A2, SULT1E1, CYP3A9, HSD17B7                  | 0.001   |
| PNILOV vs ENILOV        | 198                                             | Fatty acid metabolism                        | ACOX1, ACACB, ACADSB, ACSS2, ACSL1, ACADM, EHHADH, FADS1, FADS2, PPT1, HADH, TECR | 0.000   |
|                         |                                                 | Fatty acid degradation                       | ECI1, ACOX1, ACADSB, ACSL1, ACADM, EHHADH, HADH                                   | 0.001   |
|                         |                                                 | PPAR signaling pathway                       | ACOX1, APOA2, ACSL1, APOA1, ACADM, EHHADH, FADS2, FABP5                           | 0.002   |
|                         |                                                 | Drug metabolism - cytochrome P450            | MGST3, FMO5, GSTM2, GSTM3, FMO1, CYP2E1                                           | 0.032   |
| ENILOV vs ENIL          | 1                                               | no clusters found                            |                                                                                   |         |
| PNILOV vs PNIL          | 97                                              | no clusters found                            |                                                                                   |         |

Gene names are listed according to HGNC guidelines (<https://www.genenames.org>).

**Supplementary Table 5** Nutrition regime of experimental groups.

| group  | infusion                          | i.v. energy<br>(kcal . day <sup>-1</sup> ) | per os energy (kcal . day <sup>-1</sup> ) |               |
|--------|-----------------------------------|--------------------------------------------|-------------------------------------------|---------------|
|        |                                   |                                            | lipid<br>emulsion                         | SD (granules) |
| CTRL   | Plasmalyte                        | -                                          | -                                         | 60            |
| ENIL   | Plasmalyte                        | -                                          | 20                                        | 40            |
| ENILOV | Plasmalyte                        | -                                          | 20                                        | 40            |
| PNIL   | Intralipid                        | 59.1                                       | -                                         | -             |
| PNILOV | Intralipid + Omegaven (V:V/1:1.7) | 59.2                                       | -                                         | -             |

SD, standard diet

**Supplementary Table 6** Composition of parenteral nutrition mixture

**Crude elements**

| Ingredients                                    | kcal . kg-1 . day-1 | % of non-amino acid energy |
|------------------------------------------------|---------------------|----------------------------|
| amino acid solution (Aminoplasmal 15%)         | 5                   |                            |
| glucose                                        | 140                 | 70                         |
| lipid emulsion (Intralipid 20%)                | 60                  | 30                         |
| or                                             |                     |                            |
| lipid emulsion (Intralipid 20% + Omegaven 10%) | 60                  | 30                         |
| total energy                                   | 205                 |                            |

**Amino acid composition**

|               | mg . kg-1 . day-1 |
|---------------|-------------------|
| Isoleucine    | 47                |
| Leucine       | 91                |
| Lysine        | 64                |
| Methionine    | 46                |
| Phenylalanine | 46                |
| Threonine     | 43                |
| Tryptophan    | 17                |
| Valine        | 58                |
| Arginine      | 128               |
| Histidine     | 42                |
| Glycine       | 154               |
| Alanine       | 179               |
| Proline       | 59                |
| Aspartic acid | 64                |
| Cysteine      | 3                 |
| Glutamic acid | 130               |
| Serine        | 24                |
| Tyrosine      | 4                 |

**Vitamins**

|                      | mg . kg-1 . day-1 |
|----------------------|-------------------|
| Thiamin (B1)         | 124               |
| Riboflavin (B2)      | 140               |
| Pyridoxine (B6)      | 155               |
| Cyancobalamine (B12) | 0.2               |
| Nicotinamide         | 1552              |
| Panthenic acid       | 582               |
| Ascorbic acid (C)    | 3880              |
| Biotin               | 2.3               |
| Folic acid           | 15.5              |

**Electrolytes**

|        | mg . kg-1 . day-1 |
|--------|-------------------|
| Na+    | 15.6              |
| K+     | 1.05              |
| Mg2+   | 0.45              |
| Ca2+   | 0.18              |
| Cl-    | 16.1              |
| SO42-  | 0.45              |
| HPO42- | 0.21              |
| H2PO4- | 0.11              |

**Trace elements**

|      | mg . kg-1 . day-1 |
|------|-------------------|
| Cr3+ | 0.008             |
| Cu2+ | 0.233             |
| Fe3+ | 0.776             |
| Mn2+ | 0.039             |
| Mo6+ | 0.008             |
| Se4+ | 0.039             |
| Zn2+ | 2.988             |
| I-   | 0.039             |
| F-   | 1.940             |

Supplementary Table 7 Primer sequences.

| Gene  | Forward Primer            | Reverse Primer                   | ID gene        |
|-------|---------------------------|----------------------------------|----------------|
| Hmox1 | ACATTGAGCTGTTTGAGGAGCTG   | GTCGCCAACAGGAACTGAG              | NM_012580.2    |
| Nqo1  | GGTGATATTCAGTTCCATTG      | AGACCTGGAAGCCACAGAAG             | NM_017000.3    |
| Gclc  | GAGAGCATCTGGAGAACTAATGAC  | TCTTCACAGCGTCTGAGTGG             | NM_012815.2    |
| Ccr-2 | TTTGATCCTGCCCTACTTG       | AACGCAGCAGTG AACGCAGCAGTGTGCATTC | NM_021866.1    |
| Il8   | CGAAGTCATAGCCACACTC       | AGGACCCTCAATAGAAATCG             | NM_030845.1    |
| Il1b  | AGTCTGCACAGTTCCCAAC       | GAGACCTGACTTTGGCAGAGG            | NM_031512.2    |
| Tnfa  | CAAGGAGGAGAAGTCCCAAAATG   | GCTTGGTGGTTGCTACGAC              | NM_012675.3    |
| B2M   | CCATTCAGAAAACCTCCCAAAATTC | GGCTCCTTCAGAGTGACGTG             | NM_012512.2    |
| Cyc 1 | GGGACTCAAGATGTTGTTGATG    | GTTCTGGTCTGCTGAGAGC              | NM_001277194.1 |
| Alox5 | TTGGCCAGTATGACTGGTGCTC    | CTCCAGGTCTTGCGGAATC              | NM_012888.1    |
| Ptges | GGAAGAAGGCTTTTGCCAAC      | TGGGTCCAGGAATGAGTAG              | NM_021583.3    |
| Ptgs1 | CTGTGCTAGACAGTGTGCTC      | GATTTCTGGGTCCTCTGG               | NM_031557.2    |
| Ptgs2 | TGTTGACGTCCAGATCAC        | TCCTCAGAAGAACCTTTTCC             | NM_017232.3    |
| Il4   | GGCAACAAGGAACACCAC        | AGGACATGGAAGTGCAGGAC             | NM_201270.1    |
| Il6   | CTCTCCGCAAGAGACTCCAG      | ACAGTGATCATCGCTGTTT              | NM_012589.1    |
